# Supplementary material for: Low Self-Esteem and Life Satisfaction as a Significant Risk Factor for Eating Disorders among Adolescents
Source: MDPI journal article supplement (doi:10.3390/nu15071603), 2023-03-25
Supplement: s1 [file s1]

Supplementary Table S3. Treatment for eating disorders and self-esteem.

| Treatment for eating disorders | Basic descriptive statistics |        |        |       |       |            |              |                    |
|--------------------------------|------------------------------|--------|--------|-------|-------|------------|--------------|--------------------|
|                                | n                            | Medium | Median | Min.  | Max.  | Quartile I | Quartile III | Standard deviation |
| <b>Yes</b>                     | 20                           | 25,90  | 26,50  | 19,00 | 33,00 | 22,50      | 28,00        | 3,65               |
| <b>No</b>                      | 213                          | 23,68  | 24,00  | 13,00 | 33,00 | 21,00      | 26,00        | 3,86               |
| <b>Total</b>                   | 233                          | 23,87  | 24,00  | 13,00 | 33,00 | 22,00      | 27,00        | 3,89               |
| Z=2,26 p=0,023                 |                              |        |        |       |       |            |              |                    |

Z- Mann-Whitney U test result; red color indicate significant values ( $p < 0.05$ )
