# Supplementary material for: Low Self-Esteem and Life Satisfaction as a Significant Risk Factor for Eating Disorders among Adolescents
Source: MDPI journal article supplement (doi:10.3390/nu15071603), 2023-03-25
Supplement: s1 [file s1]

Supplementary Table S1. The influence of age on losing more than 10 kg weight.

| Losing 10 kg or more | Basic descriptive statistics |        |        |       |       |            |              |                    |
|----------------------|------------------------------|--------|--------|-------|-------|------------|--------------|--------------------|
|                      | n                            | Medium | Median | Min.  | Max.  | Quartile I | Quartile III | Standard deviation |
| <b>Yes</b>           | 53                           | 14,87  | 14,00  | 12,00 | 19,00 | 13,00      | 17,00        | 2,45               |
| <b>No</b>            | 180                          | 15,64  | 16,00  | 12,00 | 19,00 | 13,00      | 17,50        | 2,27               |
| <b>Total</b>         | 233                          | 15,47  | 16,00  | 12,00 | 19,00 | 13,00      | 17,00        | 2,33               |
| Z=-2,06 p=0,039      |                              |        |        |       |       |            |              |                    |

Z- Mann-Whitney U test result; red color indicate significant values ( $p < 0.05$ )
