# Supplementary material for: Low Self-Esteem and Life Satisfaction as a Significant Risk Factor for Eating Disorders among Adolescents
Source: MDPI journal article supplement (doi:10.3390/nu15071603), 2023-03-25
Supplement: s1 [file s1]

Supplementary Table S2. Weight loss of 10 kg or more and self-esteem

| Losing 10 kg or more | Basic descriptive statistics |        |        |       |       |            |              |                    |
|----------------------|------------------------------|--------|--------|-------|-------|------------|--------------|--------------------|
|                      | n                            | Medium | Median | Min.  | Max.  | Quartile I | Quartile III | Standard deviation |
| <b>Yes</b>           | 53                           | 25,02  | 26,00  | 15,00 | 32,00 | 22,00      | 28,00        | 3,92               |
| <b>No</b>            | 180                          | 23,53  | 24,00  | 13,00 | 33,00 | 21,00      | 26,00        | 3,82               |
| <b>Total</b>         | 233                          | 23,87  | 24,00  | 13,00 | 33,00 | 22,00      | 27,00        | 3,89               |
| Z=2,55 p=0,010       |                              |        |        |       |       |            |              |                    |

Z- Mann-Whitney U test result; red color indicate significant values (p < 0.05)
